# Supplementary material
Source: Springer Nature journal article supplement (https://www.springermedizin.de/resource/supplementary/12936_2013_3070_MOESM4_ESM.pdf/9546282)
Supplement: MOESM4 [file 9546282]

### 37 Participants enrolled

D0 samples, Pv (+)\*: n = 37  
ssPCR(+): n = 35

#### 2-year follow up after treatment

Month 1: weekly  
Month 2-4: monthly

No Pv recurrences: 9 participants

### Pv recurrences: 28 participants

Total episodes, Pv (+): n = 142  
ssPCR(+): n = 140

1<sup>st</sup> year (n=66)  
2<sup>nd</sup> year (n=76)

1 Pv sample was not  
analysed by MS genotyping

### MS genotyping

D0 + recurrences  
n = 174 Pv samples

#### Overall genetic diversity analysis (n=136)

Monoclonal/complete allele data (n=125)

Monoclonal/incomplete allele data (n=11)

Polyclonal/complete+incomplete (n=28)

Negative PCR amplification (n=10)

Identified  
haplotypes  
(n=162)
